# Supplementary material
Source: publisher figshare collection journal article supplement (https://geolsoc.figshare.com/ndownloader/files/5424635)
Supplement: Supplementary file 1 [file 5424635]

Sample no	Mineral		J	± (1s)	% error		Int Age (Ma)	± (2 s)	with ± in J		Plateau Age	± (2s)	with ± in J	MSWD	% 39Ar
NED-07	MS		0.005589	0.000019	0.34		293.46	0.67	1.96	Plat Segment	292.05	1.54	2.39	0.05	23.79	Probability	Initial Ratio	Initial Ratio Error
Can/Pos	222/48	ND-5								IsoPlot PA-->	295.03	0.77	na	0.95	65.40	0.48	na	na
						Decay corrected true ratios				IsoPlot CA-->	292.40	3.20	na	1.60	94.30	0.08	477.00	200.00
Step no	Power	40Ar/39Ar	±	38Ar/39Ar	±	37Ar/39Ar	±	36Ar/39Ar	±	40Ar*/39Ar(K)	±	40Ar*	Cumulative	Age	±	Ca/K	±	Cl/K	±
	(%)		(1 s)		(1 s)		(1 s)		(1 s)		(1 s)	(%)	39Ar (%)	(Ma)	(1 s)		(1 s)		(1 s)
1	3.5	78.129	0.991	0.220	0.010	0.139	0.019	0.186	0.005	23.251	1.415	29.8	0.39	220.41	12.63	0.26	0.04	0.0394	0.00
2	4.5	33.968	0.300	0.062	0.003	0.337	0.017	0.019	0.001	28.332	0.417	83.4	1.42	265.19	3.63	0.62	0.04	0.0102	0.00
3	5.5	32.804	0.200	0.050	0.002	0.332	0.011	0.007	0.001	30.595	0.268	93.2	3.10	284.79	2.30	0.61	0.03	0.0080	0.00
4	6.5	32.953	0.165	0.052	0.002	0.284	0.008	0.005	0.000	31.573	0.187	95.8	5.74	293.18	1.61	0.52	0.03	0.0085	0.00
5	7.5	32.830	0.146	0.055	0.002	0.091	0.004	0.003	0.000	31.986	0.170	97.4	9.21	296.72	1.45	0.17	0.01	0.0093	0.00
6	8.5	32.505	0.129	0.056	0.001	0.042	0.003	0.002	0.000	31.893	0.142	98.1	14.30	295.93	1.22	0.08	0.01	0.0095	0.00
7	10.0	32.354	0.144	0.059	0.002	0.019	0.002	0.001	0.000	31.962	0.154	98.8	21.48	296.51	1.32	0.03	0.00	0.0103	0.00
8	11.5	32.243	0.157	0.058	0.002	0.009	0.002	0.001	0.000	31.883	0.168	98.9	28.23	295.84	1.44	0.02	0.00	0.0101	0.00
9	13.0	32.148	0.140	0.057	0.002	0.010	0.002	0.001	0.000	31.777	0.150	98.8	34.97	294.93	1.28	0.02	0.00	0.0098	0.00
10	15.0	32.176	0.123	0.057	0.001	0.013	0.002	0.001	0.000	31.880	0.131	99.1	43.08	295.81	1.12	0.02	0.00	0.0098	0.00
11	17.0	32.055	0.134	0.056	0.002	0.011	0.002	0.001	0.000	31.802	0.143	99.2	49.95	295.14	1.23	0.02	0.00	0.0096	0.00
12	19.0	32.035	0.134	0.056	0.002	0.017	0.002	0.001	0.000	31.757	0.144	99.1	56.59	294.76	1.23		0.00	0.0096	0.00
13	21.0	31.898	0.143	0.058	0.002	0.020	0.002	0.001	0.000	31.559	0.150	98.9	62.42	293.06	1.29	0.04	0.00	0.0100	0.00
14	23.0	31.938	0.122	0.058	0.002	0.025	0.002	0.001	0.000	31.608	0.133	99.0	68.52	293.49	1.14	0.05	0.00	0.0101	0.00
15	25.0	31.920	0.133	0.058	0.001	0.030	0.002	0.001	0.000	31.548	0.141	98.8	76.21	292.97	1.21	0.05	0.01	0.0101	0.00
16	27.0	31.932	0.163	0.059	0.001	0.025	0.003	0.001	0.000	31.483	0.169	98.6	84.34	292.41	1.45	0.05	0.01	0.0104	0.00
17	29.0	31.861	0.127	0.057	0.002	0.036	0.003	0.001	0.000	31.418	0.139	98.6	91.58	291.85	1.19	0.07	0.01	0.0097	0.00
18	31.0	31.859	0.143	0.055	0.001	0.046	0.003	0.001	0.000	31.422	0.153	98.6	100.00	291.88	1.31	0.08	0.01	0.0094	0.00
